# Supplementary material for: Patient Perspectives on Physical Activity on Prescription (PAP) in Primary Care in Sweden: A Cross-Sectional Study
Source: Research Square preprint supplement (doi:10.21203/rs.3.rs-7786932/v1), 2025-11-12
Supplement: Supplementary file 1 [file 8138337dfca1d315ae982380.docx]

**Physical Activity on Prescription (PAP) – Patient Perspectives**

*Spring 2025*

Please answer the questions below. Select one response per question unless otherwise indicated.

**Q1. Age**

◯ 18–24

◯ 25–29

◯ 30–34

◯ 35–39

◯ 40–44

◯ 45–49

◯ 50–54

◯ 55–59

◯ 60–64

◯ 65+

**Q2. Gender identity**

◯ Woman

◯ Man

◯ Non-binary

**Q3. Highest completed education**

◯ Compulsory school

◯ Upper secondary school

◯ Folk high school

◯ University/College

**Q4. Have you ever received counselling about physical activity within healthcare?**

◯ No

◯ Yes

◯ Unsure/Don’t know

**Q5a. Are you familiar with the method Physical Activity on Prescription (PAP)?**

◯ No, not at all

◯ Yes, to some extent

◯ Yes

**What is PAP?**

Physical Activity on Prescription (PAP) is a method used in healthcare whereby physical activity is prescribed as part of treatment, or as a stand‑alone treatment, to prevent and manage a range of health conditions. Patients receive a written prescription with individually tailored recommendations regarding the type of activity, its intensity and frequency. The method is often combined with support and follow‑up from healthcare, and collaboration with local providers, to promote sustainable behaviour change and improved health outcomes.

**Q5b. Have you ever been offered a PAP within healthcare?**

◯ No

◯ Yes

◯ Unsure/Don’t know

**Q6. How relevant do you consider using PAP as part of treatment for:**

Please select one option on each row.

• Pain symptoms (back, neck, muscle, etc.) [Not at all relevant / Of limited relevance / Quite relevant / Highly relevant]

• Mental health/well-being [Not at all relevant / Of limited relevance / Quite relevant / Highly relevant]

• Insomnia symptoms [Not at all relevant / Of limited relevance / Quite relevant / Highly relevant]

• Elevated blood glucose/diabetes [Not at all relevant / Of limited relevance / Quite relevant / Highly relevant]

• Overweight/obesity [Not at all relevant / Of limited relevance / Quite relevant / Highly relevant]

**Q7. Would you appreciate receiving more individual counselling about physical activity within healthcare?**

◯ No, not at all

◯ Uncertain

◯ Yes, to some extent

◯ Yes, absolutely

**Q8. Would you appreciate receiving more information about Physical Activity on Prescription (PAP) within healthcare?**

◯ No, not at all

◯ Uncertain

◯ Yes, to some extent

◯ Yes, absolutely

**Q9. Do you think the general public should be better informed about PAP?**

◯ No, not at all

◯ Uncertain

◯ Yes, to some extent

◯ Yes, absolutely

**Q10a. The following question concerns your activity habits. If your activity varies across the year, please estimate an average.**

How much time in a usual week do you spend on physical training that makes you out of breath, e.g. running, exercise classes or ball sports?

◯ 0 minutes / no time

◯ Less than 30 minutes

◯ 30–59 minutes

◯ 60–89 minutes

◯ 90–119 minutes

◯ 120 minutes or more

**Q10b. The following question concerns your activity habits. If your activity varies across the year, please estimate an average.**

How much time in a usual week do you spend on everyday activities, e.g. walking, cycling or gardening?

◯ 0 minutes / no time

◯ Less than 30 minutes

◯ 30–59 minutes

◯ 60–89 minutes

◯ 90–149 minutes

◯ 150–299 minutes

◯ 300 minutes or more

**Q10c. The following question concerns sedentary time. If your sedentary time varies across the year, please estimate an average.**

How many hours do you sit during a typical day, excluding sleep?

◯ More than 15 hours

◯ 13–15 hours

◯ 10–12 hours

◯ 7–9 hours

◯ 4–6 hours

◯ 1–3 hours

◯ Never

**Q11. How satisfied are you with your physical activity today?**

◯ I am satisfied

◯ Less satisfied

◯ Not at all satisfied

◯ I am not physically active and I am satisfied with that

*End the questionnaire here if you select “I am satisfied” or “I am not physically active and I am satisfied with that”.*

**Q12. Would you like to be more physically active?**

◯ Yes

◯ No

*End the questionnaire here if you select “No”.*

**Q13. What are the reasons you are not as physically active as you would like today?**

Please describe the barriers you personally experience (e.g. lack of time, pain/injury, health problems, lack of interest).

Free-text response:
